# Supplementary material
Source: PubMed Central journal article supplement (PMC5924597)
Supplement: NIHMS895460-supplement-supplement_1.pdf [file NIHMS895460-supplement-supplement_1.pdf]

Supplementary Information for:

***NOX1* loss-of-function genetic variants  
in patients with inflammatory bowel disease**

T. Schwerd, R. V. Bryant, S. Pandey, M. Capitani, L. Meran, J.-B. Cazier, J. Jung, K. Mondal, M. Parkes, C. Mathew, K. Fiedler, D. J. McCarthy, WGS500 Consortium, Oxford IBD cohort study investigators, COLORS in IBD, UK IBD Genetics Consortium, P. Sullivan, A. Rodrigues, S. Travis, C. Moore, J. Sambrook, W. H. Ouwehand, D. J. Roberts, J. Danesh, INTERVAL Study, R. K. Russell, D. C. Wilson, J. R. Kelsen, R. Cornall, L. A. Denson, S. Kugathasan, U. G. Knaus, E. Goncalves Serra, C. A. Anderson, R. H. Duerr, D. P. B. McGovern, J. Cho, F. Powrie, V. S. W. Li, A. M. Muise & H. H. Uhlig\*

\* Correspondence: holm.uhlig@ndm.ox.ac.uk (H.H.U.)

**The PDF file includes:**

|                          |                                                                                                                                 |
|--------------------------|---------------------------------------------------------------------------------------------------------------------------------|
| Supplementary Figure S1  | Intestinal epithelial cell proliferation and goblet cells by immunohistochemistry in <i>NOX1</i> p.N122H                        |
| Supplementary Figure S2  | Coverage of <i>NOX1</i> gene by whole genome sequencing                                                                         |
| Supplementary Figure S3  | Expression and function of NADPH oxidase ( <i>NOX</i> ) family subunits in pan-enteric biopsies                                 |
| Supplementary Figure S4  | <i>NOX1</i> protein sequence alignment                                                                                          |
| Supplementary Figure S5  | Protein sequence alignment of <i>NOX1</i> and <i>NOX2</i>                                                                       |
| Supplementary Table 1    | Minor allele frequency of <i>NOX1</i> variants                                                                                  |
| Supplementary Table 2    | In silico analysis of <i>NOX1</i> variants                                                                                      |
| Supplementary Table 3    | Rare hemizygous, homozygous and compound heterozygous variants identified by WGS in P1 (p.N122H)                                |
| Supplementary Table 4    | Patient characteristics of published hemi- and heterozygous <i>NOX1</i> variants and splice variants without functional testing |
| Supplementary Table 5    | Genetic association testing in males                                                                                            |
| Supplementary Table 6    | Genetic association testing in females                                                                                          |
| Supplementary References |                                                                                                                                 |

Supplementary Figure S1

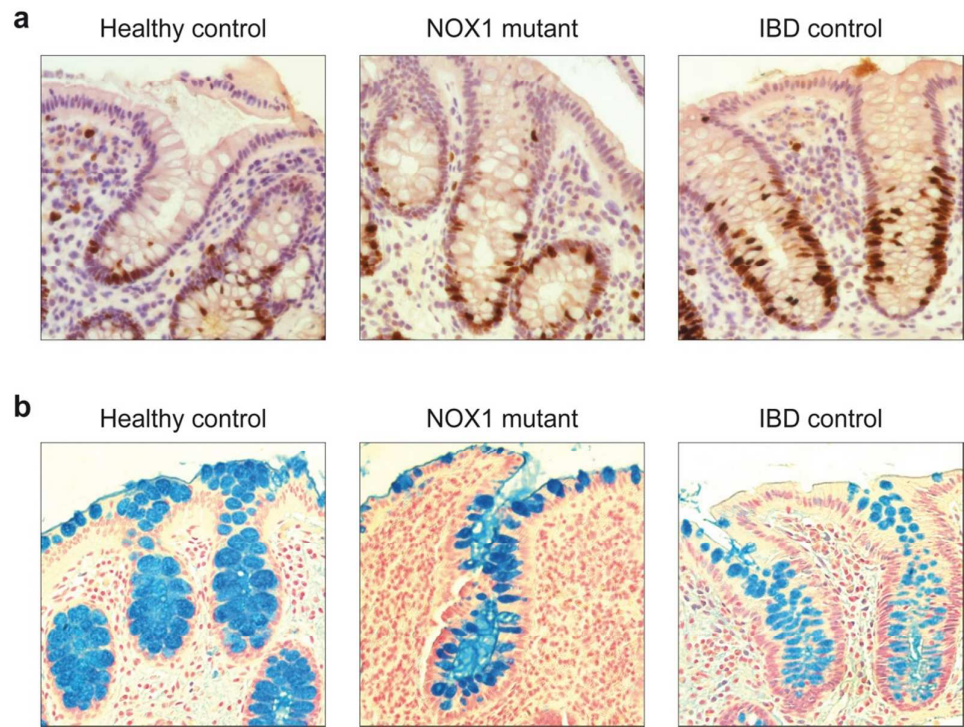

Supplementary Figure S1. **(a)** Representative images of immunohistochemistry staining of Ki67 in colonic crypts of a healthy control, the NOX1 mutant patient p.N122H and an IBD control patient. Histology for NOX1 and IBD patient was obtained during disease quiescence. **(b)** Representative images of goblet cells in colonic crypts stained with Alcian blue. Healthy control biopsy showing regular, plump goblet cells lining the colonic epithelial crypt. NOX1 patient p.N122H during active disease showing relative paucity of goblet cells and retention of mucin within goblet cells. IBD control patient during active disease showing increased number of goblet cells which are of relatively reduced size having extruded mucin onto the surface epithelium.

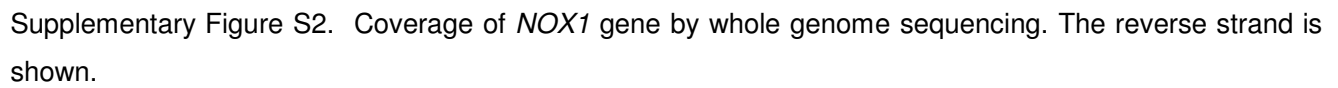

Supplementary Figure S3

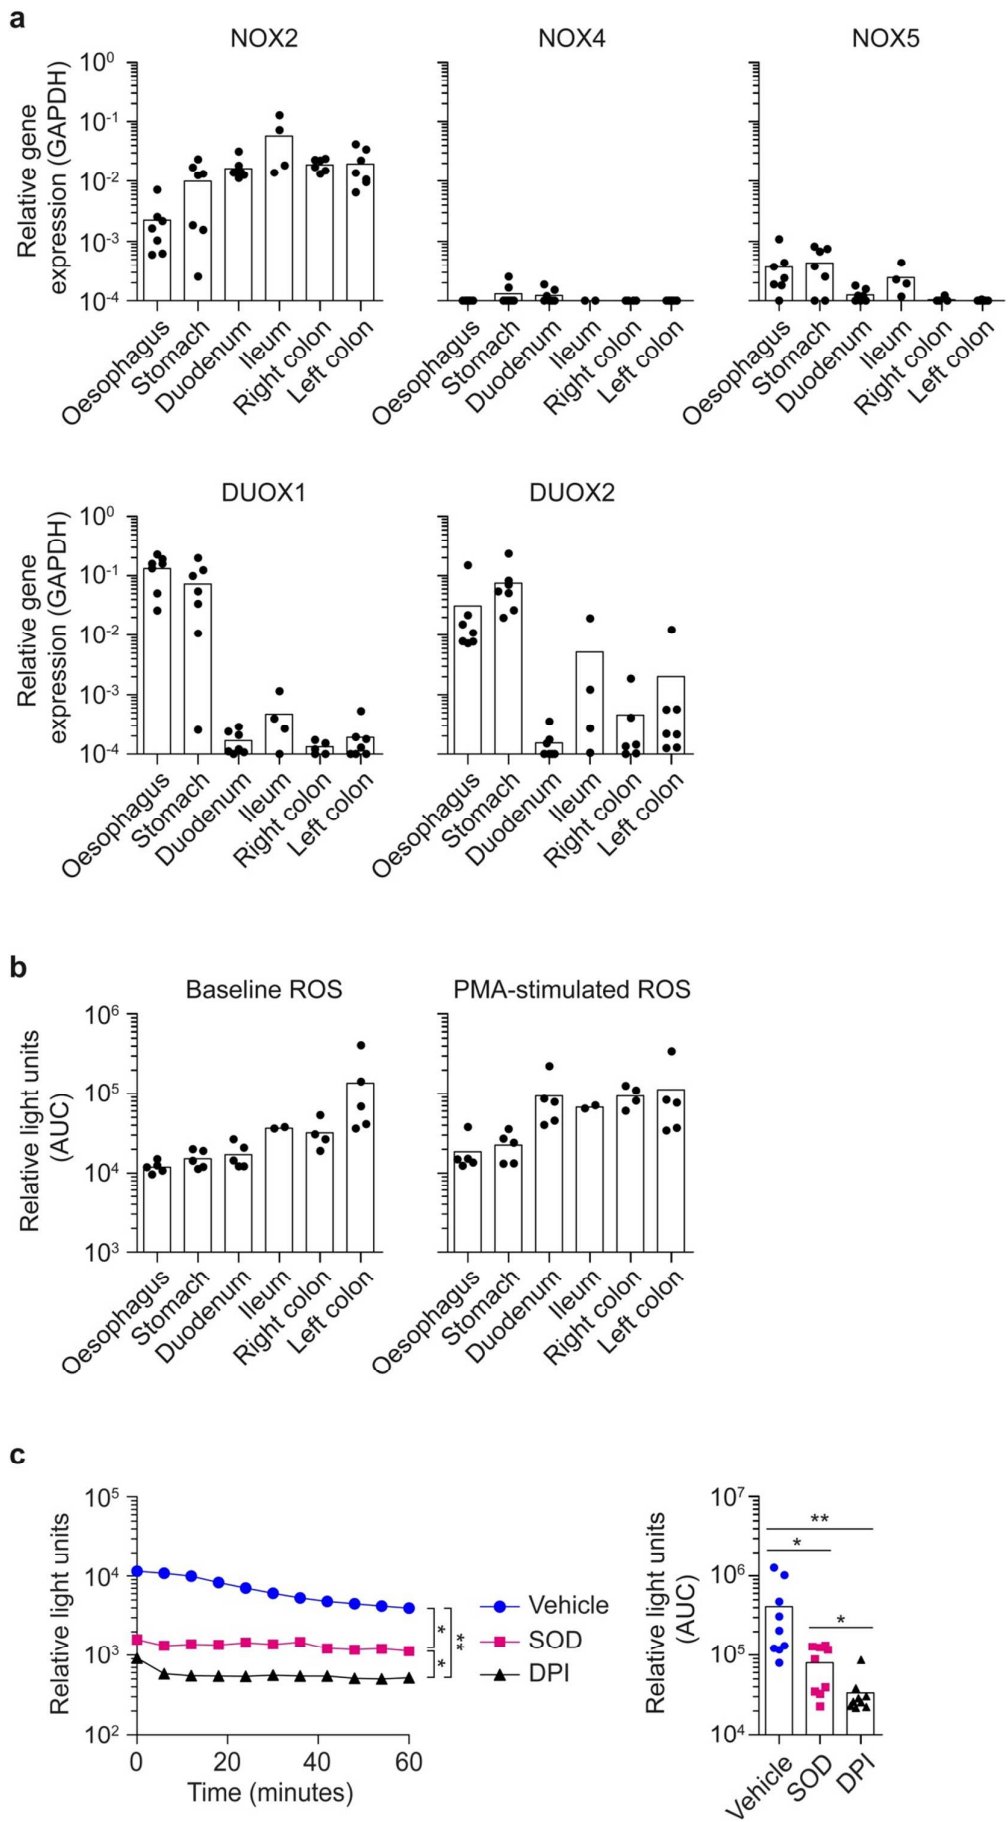

Supplementary Figure S3. **(a)** Expression of NADPH oxidase (NOX) family subunits in pan-enteric biopsies was determined by quantitative PCR, as indicated. Single biopsies per segment were obtained from 5 non-inflamed controls. Bars represent mean. **(b)** L-012-enhanced chemiluminescence on pan-enteric biopsy specimens obtained from 5 non-inflamed controls and stimulated with (right) or without (left) PMA. ROS was measured over 60 minutes and results are depicted as area under the curve (AUC). Where more than one biopsy per segment was available for a patient, the mean AUC was calculated. **(c)** SOD significantly attenuates the L-012 chemiluminescence signal, confirming specificity of the L-012 probe for superoxide rather than hydrogen peroxide. DPI however, further abrogated the chemiluminescence signal. Pan-colonic epithelial biopsies from three healthy control patients were co-incubated with L-012 alone, or together with 5  $\mu$ M SOD or 10  $\mu$ M DPI. **(c left)** ROS production measured in relative light units (RLU) from L-012 chemiluminescence was plotted as a kinetic curve over 60 minutes. **(c, right)** AUC of RLU was calculated. Experiment performed in triplicates for each condition (three biopsies per patient per condition); the kinetic curve plotted as mean of measurements, symbols on AUC graph represent results. Statistical analysis was performed using unpaired nonparametric Mann Whitney test.

Supplementary Figure S4

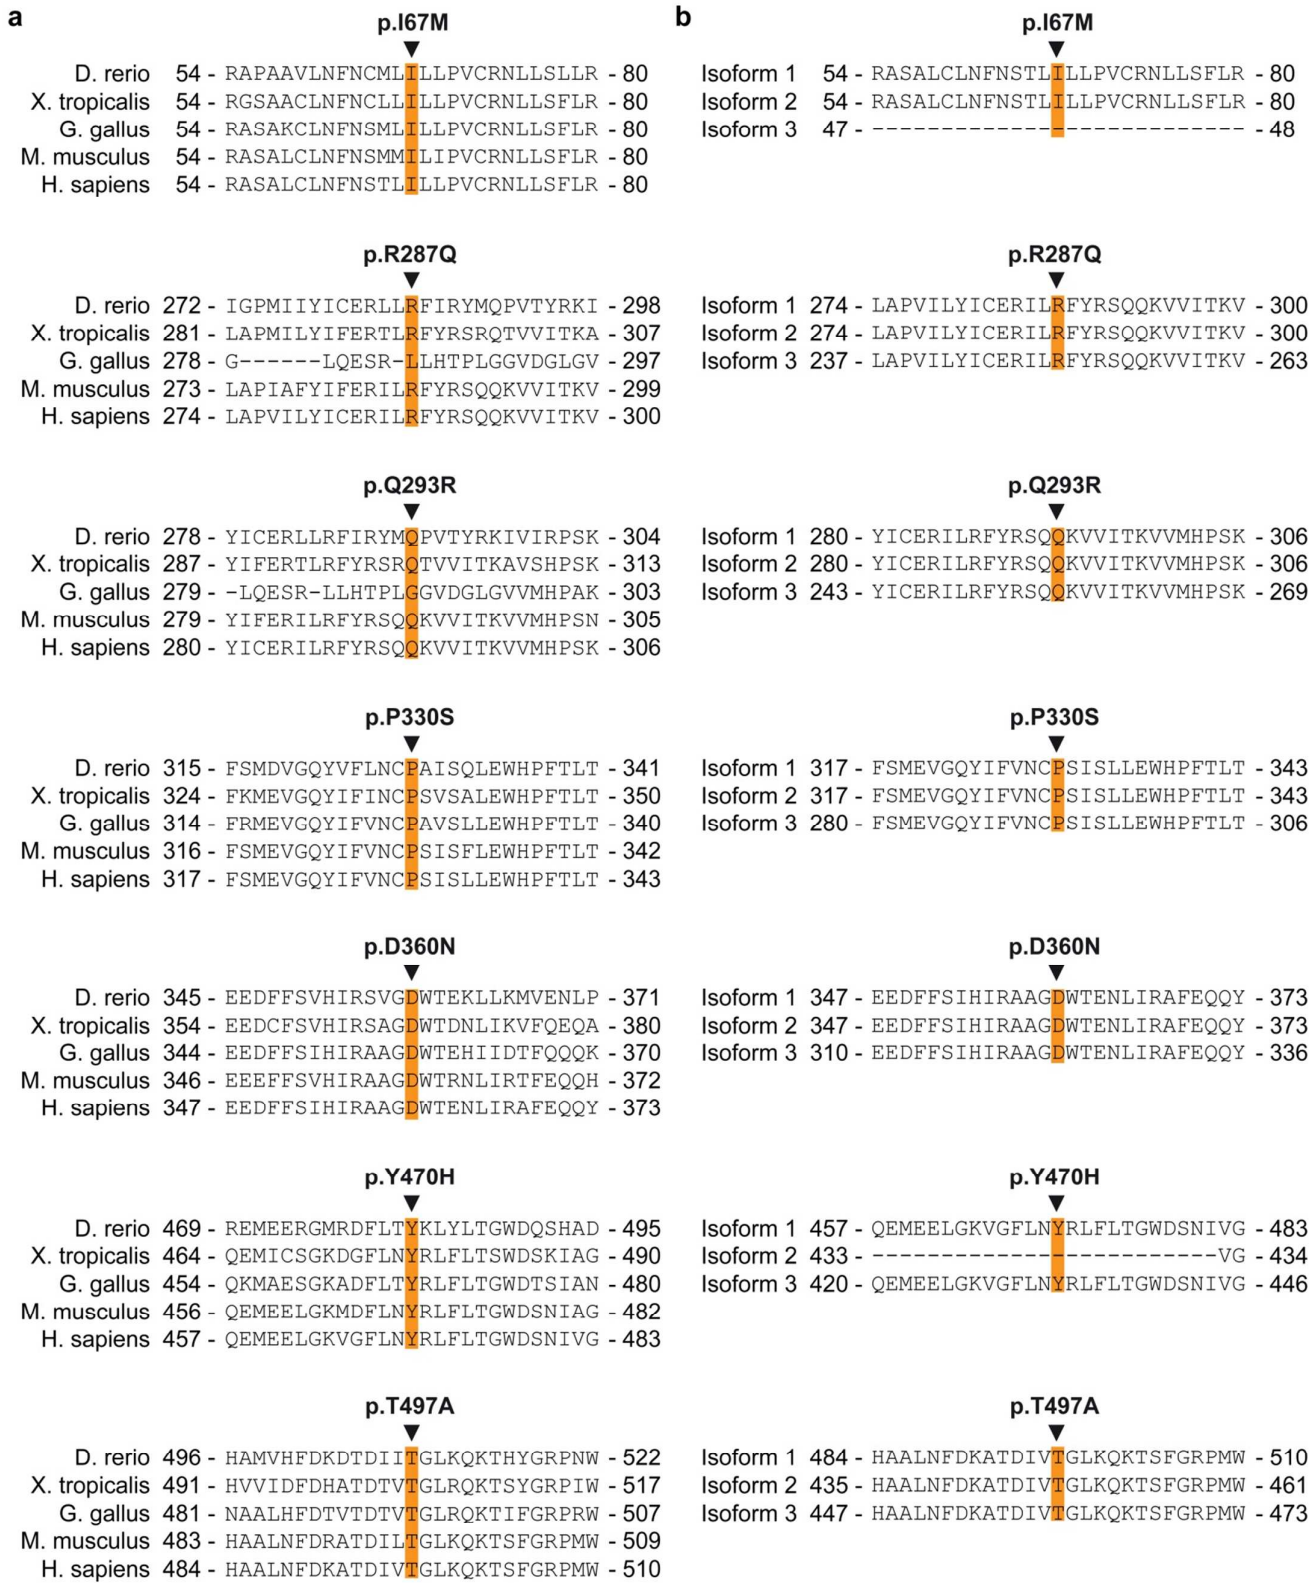

Supplementary Figure S4. **(a)** NOX1 protein sequence alignment of different genera showing the evolutionary conserved position 67, 287, 293, 330, 360, 470 and 497. Alignment was performed using ClustalW. **(b)** Corresponding amino acid sequence alignment of three NOX1 isoforms using ClustalW.

## Supplementary Figure 5

NOX1 - MGNWVVNHWFVSVLFLVWVLGLNVFLFVDAFLKYEKADKYYYTRKILGSTLACARASALCL - 60  
 NOX2 - MGNWAVNEGLSIFVILVWLGLNVFLFVWYYRVYDIPPKFFYTRKLLGSALALARAPAAACL - 60

NOX1 - NFNSTLLPVCRNLLSFLRGTCFSCSRTLRLKQLDHNLTfHKLVAymicLHTAIHIAHL - 120  
 NOX2 - NFN~~CML~~ILLPVCRNLLSFLRGSSACCSTRVRRQLDRNLTFHKMVAWMIALHSAIHIAHL - 120

NOX1 - FNFDCYSRSRQATDGSLASILSSLSHDEKKGGSWLNPIQSR--NTTVEYVTFTSIAGLT - 177  
 NOX2 - FNVEWCVNARVNNSDPYVALSELGDR--QNESYLNFAARKRIKNPEGGLYLAVTLLAGIT - 178

NOX1 - GVIMTIALILMVTSAFIRRSYFEVFWYTHHLFIFYILGLGIHGIGGIVRGQTEESMNE - 237  
 NOX2 - GVVITLCLILIITSSTKTIRRSYFEVFWYTHHLFVIFFIGLAIHGAERIVRGQTAESLAV - 238

NOX1 - SHPRKCAESFEMWDDRDShCRRPKFEGHPPEswKWILAPVILYICERILRFYRSQQKVVI - 297  
 NOX2 - HNITVCEQKISEWGKI-KECPIPQFAGNPPMTWKWIVGPMFLYLCErLVRFYRSQQKVVI - 297

NOX1 - TKVVMHPSKVLELQMNKRGSMEVGQYIFVNCPSISLLEWHPFTLTSAPEEDFFSIHIRA - 357  
 NOX2 - TKVVTHPFTIELQMKKKGFKMEVGQYIFVKCPKVSKEWHPFTLTSAPEEDFFSIHIRI - 357

NOX1 - AGDWTENLIRAFEQ-----QYSPiPRIeVDGPFGTASEdVFQYEVAVLVGAGIGVTPFA - 411  
 NOX2 - VGDWTEGLFNACGCDKQEFQDAWKLPKIAVDGPFGTASEdVFSYEVVMLVGAGIGVTPFA - 417

NOX1 - SILKSIWYKFQCADHNLKTKKIYFYWICRETGAfSWFNLLTSLEQEMEELGKVGFNLRYR - 471  
 NOX2 - SILKSVWYKYCNNAATNLKLKKIYFYWLCRDTHAFEFADLLQLLESQMqERNNAGFLSYN - 477

NOX1 - LFLTGWDSNIVGHAALNFDKATDIVTGLKQKTSFGRPMWDNEFSTIATSHPKSVVGvFLC - 531  
 NOX2 - IYL~~TGW~~DESQANHFAVHDEEKDVITGLKQKTLYGRPNWDNEFKTIASQHPNTRIGvFLC - 537

NOX1 - GPRTLAKSLRKCCCHRYSSLDPRKVQFYFNKENF - 564  
 NOX2 - GPEAL~~LA~~ETLSKQSI~~SN~~SES~~SG~~PRGVHFI~~FN~~ENF - 570

Supplementary Figure S5. Protein sequence alignment of NOX1 and NOX2. Amino acids marked in blue indicate missense mutations in NOX2 responsible for Chronic Granulomatous Disease (CGD) according to the Human Gene Mutation Database (HGMD). Conserved regions around NOX1 variants (in red) are boxed in dark blue.

Supplementary Table 1     Minor allele frequency of NOX1 variants

| Patient ID                       | NOX1 variants*                                         | Position X chromosome | rs #        | Minor allele frequency (ExAC v0.3) | NHLBI Exome Variant Server | INTERVAL cohort | UK10K consented exomes | 1000 Genomes phase I |
|----------------------------------|--------------------------------------------------------|-----------------------|-------------|------------------------------------|----------------------------|-----------------|------------------------|----------------------|
| P1                               | c.A364C<br>p.N122H                                     | 100117783             | Novel       | No MAF data                        | No MAF data                | No MAF data     | No MAF data            | No MAF data          |
| P2                               | c.T1408C<br>p.Y470H                                    | 100104304             | Novel       | 0.00001155                         | No MAF data                | No MAF data     | No MAF data            | No MAF data          |
| P3                               | c.C201G<br>p.I67M                                      | 100118525             | Novel       | No MAF data                        | No MAF data                | No MAF data     | No MAF data            | No MAF data          |
| P4, P5, P6, P12,<br>P13.1, P13.2 | c.G860A<br>p.R287Q                                     | 100106259             | rs143127702 | 0.0007329                          | 0.000663                   | 0.0001558       | No MAF data            | No MAF data          |
| P7                               | c. A878G<br>p.Q293R                                    | 100106241             | Novel       | 0.00008563                         | No MAF data                | No MAF data     | No MAF data            | No MAF data          |
| P9                               | c.C988T<br>p.P330S                                     | 100105285             | Novel       | No MAF data                        | No MAF data                | No MAF data     | No MAF data            | No MAF data          |
| P8                               | c.A1489G<br>p.T497A                                    | 100103698             | Novel       | 0.0001597                          | No MAF data                | No MAF data     | No MAF data            | No MAF data          |
| P10, P11                         | c.G1078A<br>p.D360N                                    | 100105195             | rs34688635  | 0.01782                            | 0.019881                   | 0.026           | 0.029                  | 0.022414             |
| P14                              | splice donor -<br>exon 9<br>c.1133+1G>A<br>near R378   | 100105139             | Novel       | 0.00008487                         | No MAF data                | No MAF data     | No MAF data            | No MAF data          |
| P15                              | splice acceptor -<br>exon 7<br>c.672-1G>C<br>near G224 | 100117293             | Novel       | 0.00002283                         | No MAF data                | No MAF data     | No MAF data            | No MAF data          |
| P16                              | Splice region<br>variant c.142-<br>4G>A                | 100118588             | rs201776721 | 0.0007563                          |                            |                 |                        |                      |

\* Based on NOX1 transcript variant 1.

**Supplementary Table 2    In silico analysis of NOX1 variants**

| Patient ID                       | NOX1 variants                                       | SIFT prediction<br>(cutoff = 0.05) | PolyPhen-2 prediction     | PROVEAN prediction<br>(cutoff = -2.5) | CADD score |
|----------------------------------|-----------------------------------------------------|------------------------------------|---------------------------|---------------------------------------|------------|
| P1                               | c.A364C<br>p.N122H                                  | Damaging (0.0)                     | Probably damaging (1.0)   | Deleterious (-4.68)                   | 25.4       |
| P2                               | c.T1408C<br>p.Y470H                                 | Damaging (0.001)                   | Benign (0.347)            | Deleterious (-3.79)                   | 25.2       |
| P3                               | c.C201G<br>p.I67M                                   | Damaging (0.0)                     | Probably damaging (1.0)   | Neutral (-2.42)                       | 23.8       |
| P4, P5, P6, P12,<br>P13.1, P13.2 | c.G860A<br>p.R287Q                                  | Damaging (0.0)                     | Probably damaging (1.0)   | Deleterious (-3.31)                   | 33         |
| P7                               | c. A878G<br>p.Q293R                                 | Tolerated (0.144)                  | Possibly damaging (0.635) | Deleterious (-2.65)                   | 23.6       |
| P9                               | c.C988T<br>p.P330S                                  | Tolerated (0.051)                  | Probably damaging (0.995) | Deleterious (-6.27)                   | 23.7       |
| P8                               | c.A1489G<br>p.T497A                                 | Damaging (0.019)                   | Probably damaging (1.0)   | Deleterious (-4.75)                   | 24.7       |
| P10, P11                         | c.G1078A<br>p.D360N                                 | Damaging (0.042)                   | Benign (0.446)            | Deleterious (-4.37)                   | 25.1       |
| P14                              | splice donor - exon 9<br>c.1133+1G>A<br>near R378   | NA                                 | NA                        | NA                                    | 23.4       |
| P15                              | splice acceptor - exon 7<br>c.672-1G>C<br>near G224 | NA                                 | NA                        | NA                                    | 24.2       |
| P16                              | Splice region variant<br>c.142-4G>A                 | NA                                 | NA                        | NA                                    | 3.7        |

Note: The severity of amino acid substitutions was predicted using SIFT (<http://sift.jcvi.org/>), Polyphen-2 (<http://genetics.bwh.harvard.edu/pph2/>), PROVEAN (<http://provean.jcvi.org/index.php>), or using CADD scores (<http://cadd.gs.washington.edu/>)<sup>1</sup>. NA, not applicable

Supplementary Table 3     Rare hemizygous, homozygous and compound heterozygous variants identified by WGS in p.N122H patient

| Chrom | Pos       | Ref | Alt  | Fct    | Ef                      | Gene          | Amino acid                                    |
|-------|-----------|-----|------|--------|-------------------------|---------------|-----------------------------------------------|
| X     | 11160419  | G   | T    | exonic | nonsynonymous_SNV       | ARHGAP6       | NM_013423:c.C1582A;p.P528T                    |
| X     | 69424828  | A   | T    | exonic | nonsynonymous_SNV       | DGAT2L6       | NM_198512:c.A886T;p.I296F                     |
| X     | 132092293 | G   | A    | exonic | nonsynonymous_SNV       | HS6ST2        | NM_001077188:c.C338T;p.A113V                  |
| X     | 100117783 | T   | G    | exonic | nonsynonymous_SNV       | NOX1          | NM_007052:c.A364C;p.N122H                     |
| X     | 46466524  | C   | T    | exonic | nonsynonymous_SNV       | SLC9A7        | NM_032591:c.G2041A;p.A681T                    |
| 5     | 115782730 | G   | A    | exonic | nonsynonymous_SNV       | SEMA6A        | NM_020796:c.C2672T;p.P891L                    |
| 11    | 100999245 | G   | A    | exonic | nonsynonymous_SNV       | PGR           | NM_000926:c.C557T;p.P186L                     |
| 17    | 27414024  | C   | T    | exonic | nonsynonymous_SNV       | MYO18A        | NM_078471:c.G5642A;p.R1881Q                   |
| 19    | 40732460  | C   | T    | exonic | nonsynonymous_SNV       | CNTD2         | NM_024877:c.G89A;p.S30N                       |
| 20    | 42694558  | C   | CCCG | exonic | nonframeshift_insertion | TOX2          | NM_001098798:c.1113_1114insCCG;p.S371delinsSP |
| 20    | 2844619   | G   | A    | exonic | nonsynonymous_SNV       | VPS16         | NM_080413:c.G1069A;p.E357K                    |
| 1     | 228430941 | C   | T    | exonic | nonsynonymous_SNV       | OBSCN         | NM_001098623:c.C2987T;p.A996V                 |
| 1     | 228553159 | G   | A    | exonic | nonsynonymous_SNV       | OBSCN         | NM_001098623:c.G18961A;p.G6321R               |
| 1     | 145112420 | C   | T    | exonic | stopgain_SNV            | SEC22B        | NM_004892:c.C394T;p.R132X                     |
| 1     | 145115810 | A   | G    | exonic | nonsynonymous_SNV       | SEC22B        | NM_004892:c.A569G;p.H190R                     |
| 6     | 47846793  | T   | G    | exonic | nonsynonymous_SNV       | C6orf138      | NM_001013732:c.A1787C;p.K596T                 |
| 6     | 48036121  | G   | A    | exonic | nonsynonymous_SNV       | C6orf138      | NM_001013732:c.C271T;p.L91F                   |
| 6     | 90365641  | C   | G    | exonic | nonsynonymous_SNV       | MDN1          | NM_014611:c.G15332C;p.G5111A                  |
| 6     | 90372547  | G   | T    | exonic | nonsynonymous_SNV       | MDN1          | NM_014611:c.C14376A;p.D4792E                  |
| 7     | 45121241  | C   | T    | exonic | nonsynonymous_SNV       | NACAD         | NM_001146334:c.G4216A;p.A1406T                |
| 7     | 45125429  | G   | A    | exonic | nonsynonymous_SNV       | NACAD         | NM_001146334:c.C350T;p.P117L                  |
| 7     | 149482585 | C   | T    | exonic | nonsynonymous_SNV       | SSPO          | NM_198455:c.C3005T;p.P1002L                   |
| 7     | 149484527 | T   | C    | exonic | nonsynonymous_SNV       | SSPO          | NM_198455:c.T3454C;p.W1152R                   |
| 17    | 21318773  | G   | A    | exonic | nonsynonymous_SNV       | KCNJ12_KCNJ18 | NM_001194958:c.G119A;p.R40H                   |

|    |          |   |   |        |                   |               |                              |
|----|----------|---|---|--------|-------------------|---------------|------------------------------|
| 17 | 21318952 | A | G | exonic | nonsynonymous_SNV | KCNJ12_KCNJ18 | NM_001194958:c.A298G:p.I100V |
| 17 | 21319399 | A | G | exonic | nonsynonymous_SNV | KCNJ12_KCNJ18 | NM_001194958:c.A745G:p.I249V |

Note: Filtering revealed 277 rare variants (non-synonymous AA variants/potential splice sites/ncRNA-exonic/rare <0.001 MAF variants). This included six genes with homozygous variants (SEMA6A, PGR, MYO18A, CNTD2, TOX2, VPS16), five genes with hemizygous variants (ARHGAP6, DGAT2L6, HS6ST2, NOX1, SLC9A7) and seven genes with potentially compound heterozygous variants (OBSCN, SEC22B, C6orf138, MDN1, NACAD, SSPO, KCNJ12\_KCNJ18). None of these variants have been described as causative for IBD or EBV-induced hemophagocytosis. No variants in the Crohn's disease associated gene *NOD2* were identified.

**Supplementary Table 4    Patient characteristics of published hemi- and heterozygous NOX1 variants and splice variants without functional testing**

| Patient ID | NOX1 variants                                  | Gen der | Age of diagnosis (of symptoms) in years | Diagnosis Paris class. <sup>2</sup> | Family history for IBD                | Intestinal and extra-intestinal symptoms/findings on examination (age in years)                                                                                                                  | Histology                                                                                                         | Treatment for IBD                 |
|------------|------------------------------------------------|---------|-----------------------------------------|-------------------------------------|---------------------------------------|--------------------------------------------------------------------------------------------------------------------------------------------------------------------------------------------------|-------------------------------------------------------------------------------------------------------------------|-----------------------------------|
| P9*        | c.C988T<br>p.P330S                             | M       | 1.8 (1.5)                               | IBDU;<br>E4                         | Grandmother (UC)                      | Severe pancolitis; Bloody stools (1.5); developed PSC (7.1); mild psoriasis (8.9).                                                                                                               | Granuloma                                                                                                         | AB, FTx, SALZ, NR                 |
| P10*       | c.G1078A<br>p.D360N                            | F       | 5.3                                     | UC                                  | No data provided                      | Pancolitis                                                                                                                                                                                       | No data provided                                                                                                  | No data provided                  |
| P11*       | c.G1078A<br>p.D360N                            | M       | 4.7                                     | IBDU                                | No data provided                      | Pancolitis                                                                                                                                                                                       | No data provided                                                                                                  | No data provided                  |
| P12        | c.G860A<br>p.R287Q                             | F       | 8.8                                     | CD;<br>L3L4ab, B1, G0               | Father (UC)                           | Presented with abdominal pain, fatigue, fevers, and oral ulcers, blood per rectum after painful bowel movements, perianal skin tags and mild joint pain.                                         | Loose histiocytic aggregates, severely active colitis with ulcerations                                            | Oral CS, 6-MP, ASA, IFX, ADA, MTX |
| P13.1      | c.G860A<br>p.R287Q                             | F       | 1.7                                     | CD;<br>L3, B2, G1                   | Mother P13.2 (CD)                     | Presented with bloody diarrhea and failure to thrive (1.7); initial colonoscopy with severe pancolitis, developed colonic stricture and ultimately required colectomy; severe failure to thrive. | Cryptitis, crypt abscesses, crypt distortion, multiple granulomas                                                 | ASA, AZA, MTX, CSA, IFX, ADA, AB  |
| P13.2      | c.G860A<br>p.R287Q                             | F       | Unknown                                 | CD                                  | Unknown                               | Unknown                                                                                                                                                                                          | Unknown                                                                                                           | Unknown                           |
| P14        | splice donor - exon 9<br>c.1133+1G>A near R378 | M       | 11.9 (11.2)                             | CD;<br>L2, B1                       | Father (IBDU, ankylosing spondylitis) | Large joint arthritis (10.6). Presented with diarrhea and abdominal pain (11.2). Mild pancolitis at diagnostic scope (11.9).                                                                     | Acute and chronic inflammatory infiltrate, crypt architectural distortion (shortening, branching), no granulomas. | 5-ASA, CS, AZA                    |

| Table 4 continued |                                               |        |                                         |                                     |                        |                                                                                                                                                                                                                                            |                                                                                          |                   |
|-------------------|-----------------------------------------------|--------|-----------------------------------------|-------------------------------------|------------------------|--------------------------------------------------------------------------------------------------------------------------------------------------------------------------------------------------------------------------------------------|------------------------------------------------------------------------------------------|-------------------|
| Patient ID        | NOX1 variants                                 | Gender | Age of diagnosis (of symptoms) in years | Diagnosis Paris class. <sup>2</sup> | Family history for IBD | Intestinal and extra-intestinal symptoms/findings on examination (age in years)                                                                                                                                                            | Histology                                                                                | Treatment for IBD |
| P15               | splice acceptor - exon 7 c.672-1G>C near G224 | M      | 12.7 (12.4)                             | IBDU; E4                            | No                     | Presented with bloody diarrhea and abdominal pain (12.4). Diagnostic scope reveals pancolitis (12.7). Hypertension secondary to CS, along with discovery of small right kidney (differential function: left kidney 64%; right kidney 36%). | Crypt abscesses, heavy cell infiltrates, branching glands. No giant cells or granulomas. | CS, AB, IFX.      |
| P16               | splice region variant c.142-4G>A              | M      | 5                                       | CD; B1p                             | No                     | Oral and perianal CD only                                                                                                                                                                                                                  | No data provided                                                                         | IFX, ADA          |

Note: AB, oral or i.v. antibiotics given for treatment of colitis, bowel decontamination, fistula-treatment; ADA, adalimumab; ASA, 5-aminosalicylic acid; AZA, azathioprine; CD, Crohn's Disease, CS, corticosteroids; EIMS, extra-intestinal manifestations; F, female; FTx, fecal transplant; IBDU, indeterminate colitis; IFX, infliximab; M, male; MTX, methotrexate; NR, natural remedies (e.g. curcumin); NUT, polymeric/elemental diet; PR, per rectal; PSC, primary sclerosing cholangitis SALZ, sulfasalazine; **\*Patients P9-11** are described in Hayes et al.<sup>3</sup>

Supplementary table 5                      Genetic association testing in males

| Males control |                                      | C(HOM A1) | C(HET) | C(HOM A2) | C(HAP A1) | C(HAP A2) | C(MISSING) | MAF    | Allele numbers | p-value ALLELIC Test |
|---------------|--------------------------------------|-----------|--------|-----------|-----------|-----------|------------|--------|----------------|----------------------|
|               | European ancestry exome chip dataset | 0         | 0      | 0         | 71        | 2741      | 0          | 0.0252 | 2812           |                      |
|               | INTERVAL cohort                      | 0         | 0      | 0         | 55        | 1877      | 0          | 0.0285 | 1932           |                      |
|               | Summed counts                        | 0         | 0      | 0         | 126       | 4618      | 0          | 0.0266 | 4744           |                      |
| Males IBD     |                                      | C(HOM A1) | C(HET) | C(HOM A2) | C(HAP A1) | C(HAP A2) | C(MISSING) |        |                |                      |
|               | European ancestry exome chip dataset | 0         | 0      | 0         | 147       | 5093      | 3          | 0.0281 | 5240           | 0.5047               |
|               | Oxford IBD study                     | 0         | 0      | 0         | 4         | 244       | 0          | 0.0161 | 248            |                      |
|               | COLORS in IBD                        | 0         | 0      | 0         | 1         | 60        | 0          | 0.0164 | 61             |                      |
|               | Summed counts                        | 0         | 0      | 0         | 152       | 5397      | 3          | 0.0274 | 5549           | 0.8425               |
| Males UC      |                                      | C(HOM A1) | C(HET) | C(HOM A2) | C(HAP A1) | C(HAP A2) | C(MISSING) |        |                |                      |
|               | European ancestry exome chip dataset | 0         | 0      | 0         | 84        | 2299      | 3          | 0.0352 | 2383           | 0.04243              |
|               | Oxford IBD study                     | 0         | 0      | 0         | 1         | 60        | 0          | 0.0164 | 61             |                      |
|               | COLORS in IBD                        | 0         | 0      | 0         | 0         | 18        | 0          | 0.0000 | 18             |                      |
|               | Summed counts                        | 0         | 0      | 0         | 85        | 2377      | 3          | 0.0345 | 2462           | 0.0675               |
| Males CD      |                                      | C(HOM A1) | C(HET) | C(HOM A2) | C(HAP A1) | C(HAP A2) | C(MISSING) |        |                |                      |
|               | European ancestry exome chip dataset | 0         | 0      | 0         | 61        | 2691      | 3          | 0.0222 | 2752           | 0.5045               |
|               | Oxford IBD study                     | 0         | 0      | 0         | 1         | 114       | 0          | 0.0087 | 115            |                      |
|               | COLORS in IBD                        | 0         | 0      | 0         | 1         | 27        | 0          | 0.0357 | 28             |                      |
|               | Summed counts                        | 0         | 0      | 0         | 63        | 2832      | 3          | 0.0218 | 2895           | 0.2173               |

Supplementary table 6

## Genetic association testing in females

| Female controls |                                      | C(HOM A1) | C(HET) | C(HOM A2) | C(HAP A1) | C(HAP A2) | C(MISSING) | MAF    | Allele numbers | p-value ALLELIC Test |
|-----------------|--------------------------------------|-----------|--------|-----------|-----------|-----------|------------|--------|----------------|----------------------|
|                 | European ancestry exome chip dataset | 2         | 137    | 2775      | 0         | 0         | 0          | 0.0242 | 5828           |                      |
|                 | INTERVAL cohort                      | 1         | 90     | 1764      | 0         | 0         | 0          | 0.0248 | 3710           |                      |
|                 | Summed counts                        | 3         | 227    | 4539      | 0         | 0         | 0          | 0.0244 | 9538           |                      |
| Female IBD      |                                      | C(HOM A1) | C(HET) | C(HOM A2) | C(HAP A1) | C(HAP A2) | C(MISSING) |        |                |                      |
|                 | European ancestry exome chip dataset | 7         | 271    | 5001      | 0         | 0         | 1          | 0.0270 | 10560          | 0.3044               |
|                 | Oxford IBD study                     | 2         | 15     | 248       | 0         | 0         | 0          | 0.0358 | 530            |                      |
|                 | COLORS in IBD                        | 0         | 6      | 37        | 0         | 0         | 0          | 0.0698 | 86             |                      |
|                 | Summed counts                        | 9         | 292    | 5286      | 0         | 0         | 1          | 0.0277 | 11176          | 0.1486               |
| Female UC       |                                      | C(HOM A1) | C(HET) | C(HOM A2) | C(HAP A1) | C(HAP A2) | C(MISSING) |        |                |                      |
|                 | European ancestry exome chip dataset | 1         | 131    | 2067      | 0         | 0         | 1          | 0.0302 | 4400           | 0.06982              |
|                 | Oxford IBD study                     | 0         | 5      | 43        | 0         | 0         | 0          | 0.0521 | 96             |                      |
|                 | COLORS in IBD                        | 0         | 0      | 16        | 0         | 0         | 0          | 0.0000 | 32             |                      |
|                 | Summed counts                        | 1         | 136    | 2126      | 0         | 0         | 1          | 0.0305 | 4528           | 0.04142              |
| Female CD       |                                      | C(HOM A1) | C(HET) | C(HOM A2) | C(HAP A1) | C(HAP A2) | C(MISSING) |        |                |                      |
|                 | European ancestry exome chip dataset | 5         | 135    | 2847      | 0         | 0         | 0          | 0.0243 | 5974           | 1                    |
|                 | Oxford IBD study                     | 1         | 5      | 127       | 0         | 0         | 0          | 0.0263 | 266            |                      |
|                 | COLORS in IBD                        | 0         | 5      | 13        | 0         | 0         | 0          | 0.1389 | 36             |                      |
|                 | Summed counts                        | 6         | 145    | 2987      | 0         | 0         | 0          | 0.0250 | 6276           | 0.8567               |

## Supplementary References

1. Kircher M, Witten DM, Jain P, O'Roak BJ, Cooper GM, Shendure J. A general framework for estimating the relative pathogenicity of human genetic variants. *Nature genetics* 2014; **46**(3): 310-315.
2. Levine A, Griffiths A, Markowitz J, Wilson DC, Turner D, Russell RK *et al.* Pediatric modification of the Montreal classification for inflammatory bowel disease: the Paris classification. *Inflammatory bowel diseases* 2011; **17**(6): 1314-1321.
3. Hayes P, Dhillon S, O'Neill K, Thoeni C, Hui KY, Elkadri A *et al.* Defects in NADPH Oxidase Genes and in Very Early Onset Inflammatory Bowel Disease. *Cellular and molecular gastroenterology and hepatology* 2015; **1**(5): 489-502.
